# Supplementary material
Source: publisher figshare collection journal article supplement (https://karger.figshare.com/articles/dataset/_/4702615)
Supplement: Supplementary file 5 [file 1]

**1 LEGENDS**

2 Figure 1: Cutaneous crusted erosions and lip ulcers

3 Figures 2 and 3: Ulcerations and erosions on preexistent psoriatic plaques

4 Figure 5: Skin biopsy showing abrupt parakeratosis, focal necrosis and slight degeneration of the basal layer.

5 HE. x 200
